# Supplementary material
Source: MDPI journal article supplement (https://www.mdpi.com/2079-6412/9/11/754)
Supplement: s1 [file s1]

# Surface Modification of Graphene for Use as a Structural Fortifier in Water-Borne Epoxy Coatings

Ya Liu <sup>1,2</sup>, Chao Xia <sup>3</sup>, Abdelhafid Zehri <sup>1</sup>, Lilei Ye <sup>4</sup>, Nan Wang <sup>4</sup>, Boris Zhmud <sup>3</sup>, Hongbin Lu <sup>2,\*</sup> and Johan Liu <sup>1,5,\*</sup>

<sup>1</sup> Electronics Materials and Systems Laboratory (EMSL), Department of Microtechnology and Nanoscience (MC2), Chalmers University of Technology, Kemivägen 9, SE-412 96 Göteborg, Sweden; yaliu@chalmers.se (Y.L.); hafid@chalmers.se (A.Z.)

<sup>2</sup> State Key Laboratory of Molecular Engineering of Polymers, Department of Macromolecular Science, Collaborative Innovation Center of Polymers and Polymer Composites, Fudan University, 2005 Songhu Road, Shanghai 200433, China

<sup>3</sup> Applied Nano Surfaces AB, Knivstogatan 12, SE 753 23 Uppsala, Sweden; chao.xia@appliednanosurfaces.com (C.X.); boris.zhmud@appliednanosurfaces.com (B.Z.)

<sup>4</sup> SHT Smart High Technology AB, Kemivägen 6, SE 412 58 Gothenburg, Sweden; lilei.ye@sht-tek.com (L.Y.); Nan.wang@sht-tek.com (N.W.)

<sup>5</sup> SMIT Center, School of Mechanical Engineering and Automation, Shanghai University, No. 20, Chengzhong Road, Shanghai 201800, China

\* Correspondence: hongbinlu@fudan.edu.cn (H.L.); johan.liu@chalmers.se (J.L.)

## Supplementary materials

SEM was used to analyze the geometry of pristine Graphene and GO. The size of pristine graphene is about 1–6  $\mu\text{m}$  with a standard deviation as 0.15. The geometry of reference GO is similar with pristine G with a diameter from 1–8  $\mu\text{m}$  with a standard deviation as 0.16. As shown in Figure S1c, three obvious peak were observed at wavenumber 1214, 1598 and 3370  $\text{cm}^{-1}$ , corresponding to C–O, C=C and O–H bonds. These groups provide opportunities for GO the combination with epoxy binder during curing process. From Raman spectrum of the reference GO, the  $I_D/I_G$  is 0.92, indicate the oxidant group introduce defects on GO.

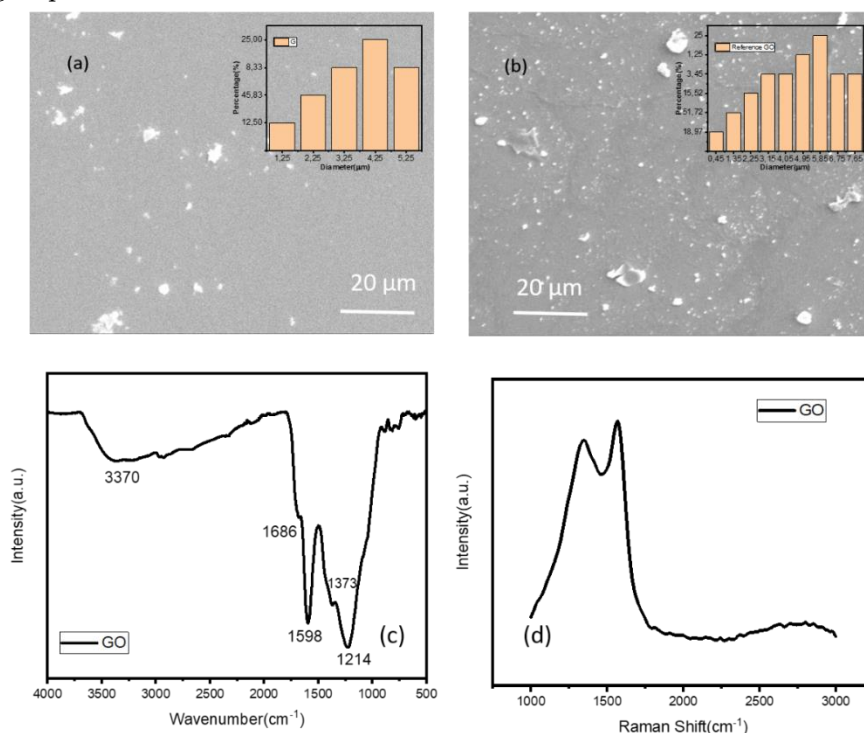

**Figure S1.** (a) SEM images of the pristine Graphene (the inset shows its size distribution); (b) SEM image of the reference GO (the inset shows its size distribution); (c) The infrared spectrum of GO; (d) Raman spectrum of GO.

Figure S2 shows the abrasion test result of pristine epoxy without additive. The COF for pristine binder is 0.75 under a dry contact with 4 N, 200 rpm.

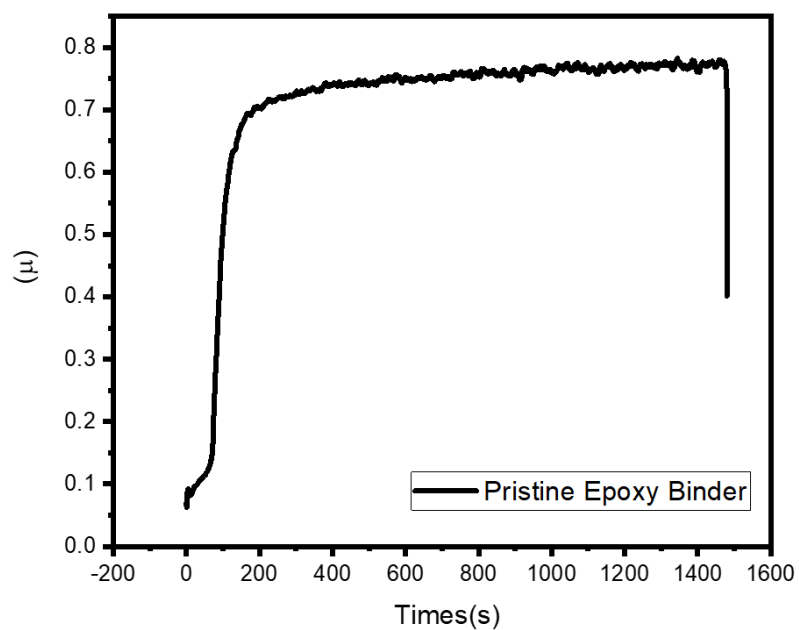

**Figure S2.** Abrasion test on stainless-steel plates of pristine epoxy binder (4 N, 200 rpm, 30 min, dry contact).
